# Supplementary material for: Inhibition of Membrane-Bound BAFF by the Anti-BAFF Antibody Belimumab
Source: PubMed Central journal article supplement (PMC6256835; doi:10.3389/fimmu.2018.02698), 2018-11-20
Supplement: Data_Sheet_1.pdf [file Data_Sheet_1.pdf]

Quintas et al Figure 1 Panel A

| Cells: 293T-544 (BAFF full) + EGFP-515, transient |                                                                               |           |           | 293T-2809 (BAFF ΔFS) + EGFP-515, transient                                    |           |           | 293T-3296 (BAFF Δstalk) + EGFP-515, transient                                 |           |           | 293T-015 (Mock) + EGFP-515, transient                                         |           |      |
|---------------------------------------------------|-------------------------------------------------------------------------------|-----------|-----------|-------------------------------------------------------------------------------|-----------|-----------|-------------------------------------------------------------------------------|-----------|-----------|-------------------------------------------------------------------------------|-----------|------|
| Staining reagent:                                 | atacept                                                                       | atacept   | atacept   | atacept                                                                       | atacept   | atacept   | atacept                                                                       | atacept   | atacept   | atacept                                                                       | atacept   |      |
| Measure:                                          | MFI of atacept staining (FL2) for cells having 2x10e4 to 2x10e5 of EGFP (FL1) |           |           | MFI of atacept staining (FL2) for cells having 2x10e4 to 2x10e5 of EGFP (FL1) |           |           | MFI of atacept staining (FL2) for cells having 2x10e4 to 2x10e5 of EGFP (FL1) |           |           | MFI of atacept staining (FL2) for cells having 2x10e4 to 2x10e5 of EGFP (FL1) |           |      |
| [ng/ml]                                           |                                                                               |           |           |                                                                               |           |           |                                                                               |           |           |                                                                               |           |      |
| 100                                               | 190259                                                                        | 170898    | 195676    | 560693                                                                        | 698693    | 705693    | 43024                                                                         | 45573     | 46044     | 1716                                                                          | 1864      | 1846 |
| 10                                                | 145194                                                                        | 154782    | 149990    | 586693                                                                        | 686693    | 684693    | 40923                                                                         | 40495     | 42505     | 1751                                                                          | 2050      | 1779 |
| 1                                                 | 26170                                                                         | 27268     | 25940     | 120148                                                                        | 111893    | 108032    | 20357                                                                         | 23227     | 22972     | 1839                                                                          | 1965      | 1849 |
| 0.1                                               | 4785                                                                          | 4918      | 5276      | 16381                                                                         | 15774     | 15949     | 4710                                                                          | 5256      | 5061      | 1721                                                                          | 1955      | 1891 |
| ∅                                                 | 1888                                                                          | 1956      | 2087      | 1591                                                                          | 1657      | 2683      | 1686                                                                          | 1938      | 2306      | 1710                                                                          | 2072      | 2148 |
| Cells: 293T-544 (BAFF full) + EGFP-515, transient |                                                                               |           |           | 293T-2809 (BAFF ΔFS) + EGFP-515, transient                                    |           |           | 293T-3296 (BAFF Δstalk) + EGFP-515, transient                                 |           |           | 293T-015 (Mock) + EGFP-515, transient                                         |           |      |
| Staining reagent:                                 | belimumab                                                                     | belimumab | belimumab | belimumab                                                                     | belimumab | belimumab | belimumab                                                                     | belimumab | belimumab | belimumab                                                                     | belimumab |      |
| Measure:                                          | MFI of atacept staining (FL2) for cells having 2x10e4 to 2x10e5 of EGFP (FL1) |           |           | MFI of atacept staining (FL2) for cells having 2x10e4 to 2x10e5 of EGFP (FL1) |           |           | MFI of atacept staining (FL2) for cells having 2x10e4 to 2x10e5 of EGFP (FL1) |           |           | MFI of atacept staining (FL2) for cells having 2x10e4 to 2x10e5 of EGFP (FL1) |           |      |
| [ng/ml]                                           |                                                                               |           |           |                                                                               |           |           |                                                                               |           |           |                                                                               |           |      |
| 100                                               | 353592                                                                        | 342736    | 367421    | 1346383                                                                       | 1376383   | 1176383   | 108049                                                                        | 108490    | 118207    | 1978                                                                          | 2127      | nd   |
| 10                                                | 417140                                                                        | 371632    | 388386    | 1136383                                                                       | 1106383   | 1006383   | 81897                                                                         | 79935     | 82305     | 1885                                                                          | 2039      | nd   |
| 1                                                 | 75182                                                                         | 80876     | 78225     | 186334                                                                        | 227418    | 157711    | 18334                                                                         | 18923     | 19247     | 1925                                                                          | 1930      | nd   |
| 0.1                                               | 6445                                                                          | 7817      | 7200      | 26887                                                                         | 35014     | 18950     | 5874                                                                          | 4053      | 3951      | 1840                                                                          | 1997      | nd   |
| ∅                                                 | 2696                                                                          | 11166*    | 1321      | 3037                                                                          | 1882      | 1108      | 1803                                                                          | 2058      | 2165      | 1924                                                                          | 2020      | nd   |
| Cells: 293T-544 (BAFF full) + EGFP-515, transient |                                                                               |           |           | 293T-2809 (BAFF ΔFS) + EGFP-515, transient                                    |           |           | 293T-3296 (BAFF Δstalk) + EGFP-515, transient                                 |           |           | 293T-015 (Mock) + EGFP-515, transient                                         |           |      |
| Staining reagent:                                 | denosumab                                                                     | denosumab | denosumab | denosumab                                                                     | denosumab | denosumab | denosumab                                                                     | denosumab | denosumab | denosumab                                                                     | denosumab |      |
| Measure:                                          | MFI of atacept staining (FL2) for cells having 2x10e4 to 2x10e5 of EGFP (FL1) |           |           | MFI of atacept staining (FL2) for cells having 2x10e4 to 2x10e5 of EGFP (FL1) |           |           | MFI of atacept staining (FL2) for cells having 2x10e4 to 2x10e5 of EGFP (FL1) |           |           | MFI of atacept staining (FL2) for cells having 2x10e4 to 2x10e5 of EGFP (FL1) |           |      |
| [ng/ml]                                           |                                                                               |           |           |                                                                               |           |           |                                                                               |           |           |                                                                               |           |      |
| 100                                               | 2429                                                                          | 2138      | 2425      | 1559                                                                          | 1050      | -510*     | 2243                                                                          | 2267      | 2887      | 2238                                                                          | 1859      | 2151 |
| 10                                                | 3009                                                                          | 2161      | 2447      | 1907                                                                          | 2590      | 1076      | 3059                                                                          | 2223      | 2264      | 2089                                                                          | 1956      | 2004 |
| 1                                                 | 2191                                                                          | 30844*    | 2335      | 1801                                                                          | 2169      | 1267      | 2214                                                                          | 2531      | 2145      | 2105                                                                          | 2079      | 2241 |
| 0.1                                               | 2241                                                                          | 13200*    | 2225      | 2995                                                                          | 2864      | 2690      | 2817                                                                          | 2376      | 2202      | 2126                                                                          | 2412      | 2179 |
| ∅                                                 | 2643                                                                          | 6909*     | 1951      | 2765                                                                          | 1792      | 2333      | 2368                                                                          | 2344      | 2179      | 2164                                                                          | 1999      | 2727 |

Remarks: Values in blue were excluded from the analysis

Background was subtracted to get similar MFI in unstained cells

Background subtracted from 293T-015 Atacept: 171

Background subtracted from 293T-015 Belimumab: 192

Background subtracted from 293T-015 Denosumab: 170

Background subtracted from 293T-544 Atacept: 1037

Background subtracted from 293T-544 Belimumab: 3860

Background subtracted from 293T-544 Denosumab: 1063

Background subtracted from 293T-2809 Atacept: 3307

Background subtracted from 293T-2809 Belimumab: 3613

Background subtracted from 293T-2809 Denosumab: 3170

Background subtracted from 293T-3296 Atacept: 0

Background subtracted from 293T-3296 Belimumab: 0

Background subtracted from 293T-3296 Denosumab: 0

Quintas et al Figure 1 Panel B

| Cells:            | 293T-544 (BAFF full) + EGFP-515, transient                                    |       |       | 293T-2809 (BAFF ΔFS) + EGFP-515, transient                                    |        |        | 293T-3296 (BAFF Δstalk) + EGFP-515, transient                                 |       |       | 293T-015 (Mock) + EGFP-515, transient                                         |      |      |
|-------------------|-------------------------------------------------------------------------------|-------|-------|-------------------------------------------------------------------------------|--------|--------|-------------------------------------------------------------------------------|-------|-------|-------------------------------------------------------------------------------|------|------|
| Staining reagent: | BCMA-COMP-Flag-1282                                                           |       |       | BCMA-COMP-Flag-1282                                                           |        |        | BCMA-COMP-Flag-1282                                                           |       |       | BCMA-COMP-Flag-1282                                                           |      |      |
| Measure:          | MFI of atacept staining (FL2) for cells having 2x10e4 to 2x10e5 of EGFP (FL1) |       |       | MFI of atacept staining (FL2) for cells having 2x10e4 to 2x10e5 of EGFP (FL1) |        |        | MFI of atacept staining (FL2) for cells having 2x10e4 to 2x10e5 of EGFP (FL1) |       |       | MFI of atacept staining (FL2) for cells having 2x10e4 to 2x10e5 of EGFP (FL1) |      |      |
| Competitor:       |                                                                               |       |       |                                                                               |        |        |                                                                               |       |       |                                                                               |      |      |
| None:             | 25321                                                                         | 25141 | 26095 | 100458                                                                        | 104485 | 107111 | 36885                                                                         | 37654 | 37941 | 2169                                                                          | 1811 | 1743 |
| Atacept:          | 1182                                                                          | 1232  | 991   | 2047                                                                          | 1859   | 2013   | 1583                                                                          | 1296  | 1688  | 1279                                                                          | 1442 | 1314 |
| Belimumab:        | 1627                                                                          | 1675  | 1789  | 3918                                                                          | 4531   | 3384   | 8504                                                                          | 7809  | 7353  | 1769                                                                          | 1736 | 1614 |
| Denosumab         | 25249                                                                         | 25650 | 24517 | 109682                                                                        | 105439 | 106517 | 36585                                                                         | 36623 | 36576 | 1805                                                                          | 1767 | 1537 |

Quintas et al Figure 2 Panel A

| Cells:      | CHO-3296 clone 7 | CHO-3296 clone 7 | CHO-3296 clone 7 |
|-------------|------------------|------------------|------------------|
| Staining    | Atacicept        | Belimumab        | Denosumab        |
| Measure:    | MFI              | MFI              | MFI              |
| ng/staining |                  |                  |                  |
| 111.1111    | 4612             | 5608             | 1237             |
| 37.03704    | 4218             | 4937             | 1233             |
| 12.34568    | 3652             | 4191             | 1263             |
| 4.115226    | 3097             | 3193             | 1238             |
| 1.371742    | 2705             | 2424             | 1262             |
| 0.3429355   | 1285             | 1243             | 1294             |

Quintas et al Figure 2 Panel B

| Target cells:      |             | Jurkat JOM2 BAFFR:Fas-2308 cl21 |       |       | Jurkat JOM2 BAFFR:Fas-2308 cl21 |       |       | Jurkat JOM2 BAFFR:Fas-2308 cl21 |       |       |
|--------------------|-------------|---------------------------------|-------|-------|---------------------------------|-------|-------|---------------------------------|-------|-------|
| Effector:          |             | Conditioned medium of CHO-3296  |       |       | Conditioned medium of CHO       |       |       | Fc-hBAFF-1196                   |       |       |
| Measure:           |             | Reporter cell viability [A492]  |       |       | Reporter cell viability [A492]  |       |       | Reporter cell viability [A492]  |       |       |
| Conditioned medium |             |                                 |       |       |                                 |       |       |                                 |       |       |
| Fc-BAFF-1196       | ng/ml       |                                 |       |       |                                 |       |       |                                 |       |       |
|                    | μl          |                                 |       |       |                                 |       |       |                                 |       |       |
| 50                 | 50          | 0.857                           | 0.78  | 0.734 | 0.538                           | 0.668 | 0.588 | 0.191                           | 0.196 | 0.212 |
| 25                 | 25          | 0.996                           | 0.85  | 0.84  | 0.718                           | 0.775 | 0.684 | 0.193                           | 0.2   | 0.201 |
| 12.5               | 12.5        | 0.942                           | 0.91  | 0.862 | 0.74                            | 0.801 | 0.76  | 0.204                           | 0.196 | 0.207 |
| 6.25               | 6.25        | 0.916                           | 0.844 | 0.914 | 0.809                           | 0.797 | 0.759 | 0.2                             | 0.198 | 0.202 |
| 3.125              | 3.125       | 0.904                           | 0.98  | 0.907 | 0.839                           | 0.814 | 0.791 | 0.202                           | 0.194 | 0.207 |
| 1.5625             | 1.5625      | 0.92                            | 1.006 | 0.94  | 0.869                           | 0.821 | 0.85  | 0.204                           | 0.209 | 0.204 |
| 0.78125            | 0.78125     | 0.907                           | 1.071 | 0.979 | 0.895                           | 0.796 | 0.914 | 0.207                           | 0.206 | 0.213 |
| 0.390625           | 0.390625    | 0.901                           | 1.076 | 0.964 | 0.903                           | 0.762 | 0.841 | 0.214                           | 0.221 | 0.209 |
| 0.1953125          | 0.1953125   | 0.88                            | 1.045 | 0.86  | 0.864                           | 0.889 | 0.886 | 0.201                           | 0.199 | 0.224 |
| 0.09765625         | 0.09765625  | 0.88                            | 0.975 | 0.938 | 0.83                            | 0.811 | 0.792 | 0.2                             | 0.22  | 0.227 |
| 0.04882812         | 0.04882812  | 1.01                            | 0.972 | 0.995 | 0.987                           | 0.878 | 0.832 | 0.202                           | 0.224 | 0.245 |
| 0.02441406         | 0.02441406  | 0.977                           | 1.063 | 0.885 | 0.971                           | 0.858 | 0.851 | 0.22                            | 0.269 | 0.331 |
| 0.01220703         | 0.012207    | 0.927                           | 0.934 | 0.877 | 0.889                           | 0.895 | 0.845 | 0.222                           | 0.363 | 0.502 |
| 0.006103516        | 0.0061035   | 0.889                           | 0.933 | 0.887 | 0.901                           | 0.853 | 0.85  | 0.279                           | 0.487 | 0.741 |
| 0.003051758        | 0.003051758 | 0.951                           | 0.953 | 0.893 | 0.918                           | 0.848 | 0.816 | 0.393                           | 0.659 | 0.678 |
| ∅                  | ∅           | 0.997                           | 0.982 | 0.867 | 0.905                           | 0.842 | 0.855 | 0.822                           | 0.808 | 0.83  |

Quintas et al Figure 2 Panel C

| Effector cells:                       | CHO-3296 clone 7                       |             | CHO-3296 clone 7                       |             | CHO-3296 clone 7                       |             |
|---------------------------------------|----------------------------------------|-------------|----------------------------------------|-------------|----------------------------------------|-------------|
|                                       | Jurkat JOM2 BAFFR:Fas-2308 cl21 (CFSE) |             | Jurkat JOM2 BAFFR:Fas-2308 cl21 (CFSE) |             | Jurkat JOM2 BAFFR:Fas-2308 cl21 (CFSE) |             |
|                                       | Atacicept                              |             | Belimumab                              |             | Denosumab                              |             |
| Inhibitor:                            |                                        |             |                                        |             |                                        |             |
| Measure:                              | % viability                            | % viability | % viability                            | % viability | % viability                            | % viability |
| Inhibitor [ $\mu\text{g}/\text{ml}$ ] |                                        |             |                                        |             |                                        |             |
| 20                                    | 82.5047                                | 81.3423     | 76.63818                               | 72.79793    | 20.35365                               | 16.3959     |
| 6.666667                              | 87.89124                               | 82.3476     | 73.16479                               | 63.36178    | 19.51693                               | 14.46265    |
| 2.222222                              | 86.90115                               | 83.25733    | 57.38533                               | 45.15926    | 20.31434                               | 13.51846    |
| 0.7407407                             | 50.98103*                              | 77.32308    | 33.68484                               | 36.10007    | 23.10276                               | 14.93348    |
| 0.2469136                             | 75.4828                                | 67.26884    | 25.74807                               | 28.41499    | 22.41168                               | 17.02424    |
| 0.08230453                            | 39.54807                               | 38.572      | 24.1997                                | 22.57478    | 21.0996                                | 13.27375    |
| 0.02743484                            | 28.05652                               | 22.5418     | 26.21011                               | 16.25483    | 17.97588                               | 16.16508    |
| 0.005486968                           | 14.81746                               | 19.00875    | 20.39606                               | 17.7794     | 21.46609                               | 13.7893     |

Remark: Value in blue was excluded from the analysis

Quintas et al Figure 2 Panel D

| Effector :        | Fc-BAFF-1196 (100 ng/ml)               | Fc-BAFF-1196 (100 ng/ml)               | Fc-BAFF-1196 (100 ng/ml)               |
|-------------------|----------------------------------------|----------------------------------------|----------------------------------------|
| Target cells:     | Jurkat JOM2 BAFFR:Fas-2308 cl21 (CFSE) | Jurkat JOM2 BAFFR:Fas-2308 cl21 (CFSE) | Jurkat JOM2 BAFFR:Fas-2308 cl21 (CFSE) |
| Inhibitor:        | Atacicept                              | Belimumab                              | Denosumab                              |
| Measure:          | % viability                            | % viability                            | % viability                            |
| Inhibitor [µg/ml] |                                        |                                        |                                        |
| 2.222222          | 61.54573                               | 66.17574                               | 7.759914                               |
| 0.7407407         | 71.87395                               | 74.48164                               | 10.7481                                |
| 0.2469136         | 71.02573                               | 64.16835                               | 12.4952                                |
| 0.08230453        | 70.13562                               | 67.15076                               | 12.28478                               |
| 0.02743484        | 21.89094                               | 35.14849                               | 9.199497                               |
| 0.005486968       | 8.719499                               | 10.76799                               | 10.8003                                |

Quintas et al Figure 2 Panel E

| Effector cells:   | CHO                                    | CHO                                    | CHO                                    |
|-------------------|----------------------------------------|----------------------------------------|----------------------------------------|
| Target cells:     | Jurkat JOM2 BAFFR:Fas-2308 cl21 (CFSE) | Jurkat JOM2 BAFFR:Fas-2308 cl21 (CFSE) | Jurkat JOM2 BAFFR:Fas-2308 cl21 (CFSE) |
| Inhibitor:        | Atacicept                              | Belimumab                              | Denosumab                              |
| Measure:          | % viability                            | % viability                            | % viability                            |
| Inhibitor [µg/ml] |                                        |                                        |                                        |
| 20                | 90.09245                               | 90.85391                               | 86.54024                               |
| 6.666667          | 87.90071                               | 82.55782                               | 84.3914                                |
| 2.222222          | 90.13409                               | 87.45382                               | 85.46166                               |
| 0.7407407         | 88.00522                               | 87.08832                               | 86.58247                               |
| 0.2469136         | 87.75202                               | 86.94717                               | 84.78233                               |
| 0.08230453        | 88.5471                                | 86.57661                               | 84.72982                               |
| 0.02743484        | 89.07141                               | 88.69598                               | 86.08019                               |
| 0.005486968       | 87.75867                               | 81.68044                               | 85.54778                               |

Quintas et al Figure 2 Panel F

| Effectors:        | CHO + Fc-BAFF-1196 (100 ng/ml)         | CHO + Fc-BAFF-1196 (100 ng/ml)         | CHO + Fc-BAFF-1196 (100 ng/ml)         |
|-------------------|----------------------------------------|----------------------------------------|----------------------------------------|
| Target cells:     | Jurkat JOM2 BAFFR:Fas-2308 cl21 (CFSE) | Jurkat JOM2 BAFFR:Fas-2308 cl21 (CFSE) | Jurkat JOM2 BAFFR:Fas-2308 cl21 (CFSE) |
| Inhibitor:        | Atacicept                              | Belimumab                              | Denosumab                              |
| Measure:          | % viability                            | % viability                            | % viability                            |
| Inhibitor [µg/ml] |                                        |                                        |                                        |
| 2.222222          | 76.96738                               | 80.61203                               | 18.87001                               |
| 0.7407407         | 45.50512*                              | 82.35783                               | 23.98705                               |
| 0.2469136         | 71.29617                               | 75.66724                               | 19.36922                               |
| 0.08230453        | 81.58752                               | 77.05611                               | 16.0623                                |
| 0.02743484        | 62.77562                               | 70.06744                               | 9.78158                                |
| 0.005486968       | 25.10397                               | 17.97143                               | 15.30033                               |

Remark: Value in blue was excluded from the analysis

Quintas et al Figure 3 Panel A

| Cells:      | U937 BAFF-ko         | U937 WT              | U937 Furin-ko        |
|-------------|----------------------|----------------------|----------------------|
| Staining    | Biotinylated atacept | Biotinylated atacept | Biotinylated atacept |
| Measure:    | MFI                  | MFI                  | MFI                  |
| ng/staining |                      |                      |                      |
| 2000        | 1098                 | 1173                 | 8393                 |
| 400         | 995                  | 1110                 | 12508                |
| 80          | 915                  | 1008                 | 10917                |
| 16          | 899                  | 947                  | 8422                 |
| 3.2         | 917                  | 900                  | 4060                 |
| 0.64        | 1021                 | 934                  | 855                  |

| Cells:      | U937 BAFF-ko           | U937 WT | U937 Furin-ko |
|-------------|------------------------|---------|---------------|
| Staining    | Biotinylated belimumab |         |               |
| Measure:    | MFI                    | MFI     | MFI           |
| ng/staining |                        |         |               |
| 2000        | 835                    | 835     | 6120          |
| 400         | 898                    | 905     | 6196          |
| 80          | 898                    | 902     | 6042          |
| 16          | 867                    | 868     | 4186          |
| 3.2         | 848                    | 876     | 1983          |
| 0.64        | 861                    | 853     | 802           |



hBAFF ELISA

| Standard | Standard    | Standard |             |
|----------|-------------|----------|-------------|
| pg/ml    | Log (pg/ml) | A450     | log (A450)  |
| 1000     | 3           | 3.19     | 0.503790683 |
| 500      | 2.69897     | 1.965    | 0.293362555 |
| 250      | 2.39794     | 1.206    | 0.081347308 |
| 125      | 2.09691     | 0.775    | -0.1106983  |
| 62.5     | 1.79588     | 0.483    | -0.31605287 |
| 31.25    | 1.49485     | 0.31     | -0.50863831 |
| 15.625   | 1.19382     | 0.232    | -0.63451202 |
| 0        | #NUM!       | 0.215    | -0.66756154 |

Regression curve

Slope 0.6722  
X-intercept -1.52

Formula to convert A450 to ng/ml of hBAFF: =POWER(10,(((log A450)+1.52)/0.6722))\*[dilution factor]/1000  
Valid for 0.22 < A450 < 3.2

| S/N of cells:             | U937 BAFF-ko-3515 |             | U937 Furin-ko-3511 |             | U937 WT     |             | U937 WT     |             | U937 WT     |             |
|---------------------------|-------------------|-------------|--------------------|-------------|-------------|-------------|-------------|-------------|-------------|-------------|
| Dilution factor in ELISA: | 2                 | 2           | 2                  | 2           | 4           | 4           | 40          | 40          | 400         | 400         |
|                           | A450              | A450        | A450               | A450        | A450        | A450        | A450        | A450        | A450        | A450        |
| Time [h]                  | replicate 1       | replicate 2 | replicate 1        | replicate 2 | replicate 1 | replicate 2 | replicate 1 | replicate 2 | replicate 1 | replicate 2 |
| 1                         | 0.176             | 0.177       | 0.205              | 0.232       | 0.789       | 1.427       | 0.24        | 0.257       | 0.194       | 0.205       |
| 6                         | 0.174             | 0.16        | 0.26               | 0.24        | 3.289       | 3.511       | 0.548       | 0.575       | 0.215       | 0.197       |
| 22                        | 0.155             | 0.168       | 0.505              | 0.522       | 4           | 4           | 1.631       | 1.633       | 0.335       | 0.328       |
| 72                        | 0.181             | 0.168       | 1.435              | 1.468       | 4           | 4           | 3.855       | 3.672       | 0.817       | 0.817       |

excluded from analysis

|          | log (A450)   | log (A450)  | log (A450)   | log (A450)   | log (A450)   | log (A450)  | log (A450)   | log (A450)   | log (A450)   | log (A450)   |
|----------|--------------|-------------|--------------|--------------|--------------|-------------|--------------|--------------|--------------|--------------|
| Time [h] | replicate 1  | replicate 2 | replicate 1  | replicate 2  | replicate 1  | replicate 2 | replicate 1  | replicate 2  | replicate 1  | replicate 2  |
| 1        | -0.754487332 | -0.75202673 | -0.688246139 | -0.634512015 | -0.102922997 | 0.154423973 | -0.619788758 | -0.590066877 | -0.71219827  | -0.688246139 |
| 6        | -0.759450752 | -0.79588002 | -0.585026652 | -0.619788758 | 0.517063873  | 0.545430829 | -0.261219442 | -0.240332155 | -0.66756154  | -0.705533774 |
| 22       | -0.809668302 | -0.77469072 | -0.296708622 | -0.282329497 | 0.602059991  | 0.602059991 | 0.212453961  | 0.212986185  | -0.474955193 | -0.484126156 |
| 72       | -0.742321425 | -0.77469072 | 0.156851901  | 0.166726056  | 0.602059991  | 0.602059991 | 0.586024382  | 0.564902673  | -0.087777943 | -0.087777943 |

| hBAFF in undiluted S/N: | hBAFF [ng/ml] | hBAFF [ng/ml] | hBAFF [ng/ml] | hBAFF [ng/ml] | hBAFF [ng/ml] | hBAFF [ng/ml] | hBAFF [ng/ml] | hBAFF [ng/ml] | hBAFF [ng/ml] | hBAFF [ng/ml] | hBAFF [ng/ml] |
|-------------------------|---------------|---------------|---------------|---------------|---------------|---------------|---------------|---------------|---------------|---------------|---------------|
| Time [h]                | replicate 1   | replicate 2   | replicate 1   | replicate 2   | replicate 1   | replicate 2   | replicate 1   | replicate 2   | replicate 1   | replicate 2   |               |
| 1                       | 0.027532574   | 0.027765617   | 0.034545437   | 0.041526793   | 0.513071765   | 1.238856417   | 0.873497128   | 0.967113204   | 6.364851006   | 6.909087441   |               |
| 6                       | 0.027068424   | 0.023892901   | 0.04919777    | 0.043674856   | 4.29045275    | 4.72828119    | 2.983238784   | 3.204505635   | 7.416383585   | 6.511824631   |               |
| 22                      | 0.02279065    | 0.025691603   | 0.132087723   | 0.138756582   | 5.740474729   | 5.740474729   | 15.11295644   | 15.14053406   | 14.34575781   | 13.90209617   |               |
| 72                      | 0.028704201   | 0.025691603   | 0.624601312   | 0.646088785   | 5.740474729   | 5.740474729   | 54.336592     | 50.54411909   | 54.03917273   | 54.03917273   |               |

|               | Log(hBAFF ng/ml) | Log(hBAFF ng/ml) | Log(hBAFF ng/ml) | Log(hBAFF ng/ml) | Log(hBAFF ng/ml) | Log(hBAFF ng/ml) | Log(hBAFF ng/ml) | Log(hBAFF ng/ml) | Log(hBAFF ng/ml) | Log(hBAFF ng/ml) |
|---------------|------------------|------------------|------------------|------------------|------------------|------------------|------------------|------------------|------------------|------------------|
| Log(time [h]) | replicate 1      | replicate 2      | replicate 1      | replicate 2      | replicate 1      | replicate 2      | replicate 1      | replicate 2      | replicate 1      | replicate 2      |
| 0             | -1.560153182     | -1.55649267      | -1.461609307     | -1.381671604     | -0.289821884     | 0.093020975      | -0.058738518     | -0.014522687     | 0.803788242      | 0.839420689      |
| 0.7781513     | -1.567537026     | -1.62173111      | -1.30805458      | -1.359768514     | 0.632503124      | 0.674703296      | 0.474688016      | 0.50576104       | 0.870192184      | 0.813702696      |
| 1.3424227     | -1.642243289     | -1.5902088       | -0.879137547     | -0.857746406     | 0.758947809      | 0.758947809      | 1.179349431      | 1.180141194      | 1.156723495      | 1.143080288      |
| 1.8573325     | -1.54205454      | -1.5902088       | -0.204397108     | -0.189707797     | 0.758947809      | 0.758947809      | 1.735092396      | 1.703670632      | 1.732708692      | 1.732708692      |

Values used in Fig. 3C

Quintas et al Figure 3 Panel D

| Target cells:           |              | Jurkat JOM2 BAFFR:Fas-2308 cl21 |          |           |           | Jurkat JOM2 BAFFR:Fas-2308 cl21 |          |           |           | Jurkat JOM2 BAFFR:Fas-2308 cl21 |          |           |                                             |
|-------------------------|--------------|---------------------------------|----------|-----------|-----------|---------------------------------|----------|-----------|-----------|---------------------------------|----------|-----------|---------------------------------------------|
| Effector:               |              | S/N of U937 BAFF-ko-3515        |          |           |           | S/N of U937 WT                  |          |           |           | S/N of U937 Furin-ko-3511       |          |           |                                             |
| Measure:                |              | Reporter cell viability [A492]  |          |           |           | Reporter cell viability [A492]  |          |           |           | Reporter cell viability [A492]  |          |           |                                             |
|                         |              | Time 1 h                        | Time 6 h | Time 22 h | Time 72 h | Time 1 h                        | Time 6 h | Time 22 h | Time 72 h | Time 1 h                        | Time 6 h | Time 22 h | Time 72 h                                   |
| conditioned medium [μl] | log (S/N μl) |                                 |          |           |           |                                 |          |           |           |                                 |          |           |                                             |
| 50                      | 1.69897      | 0.488                           | 0.5      | 0.555     | 0.493     | 0.303                           | 0.262    | 0.228     | 0.224     | 0.529                           | 0.516    | 0.39      | 0.285                                       |
| 25                      | 1.39794001   | 0.53                            | 0.486    | 0.485     | 0.464     | 0.35                            | 0.269    | 0.239     | 0.231     | 0.492                           | 0.516    | 0.444     | 0.304                                       |
| 12.5                    | 1.09691001   | 0.508                           | 0.501    | 0.458     | 0.455     | 0.408                           | 0.29     | 0.245     | 0.259     | 0.512                           | 0.5      | 0.479     | 0.382                                       |
| 6.25                    | 0.79588002   | 0.487                           | 0.502    | 0.471     | 0.455     | 0.436                           | 0.314    | 0.25      | 0.261     | 0.523                           | 0.505    | 0.512     | 0.388                                       |
| 3.125                   | 0.49485002   | 0.507                           | 0.518    | 0.442     | 0.463     | 0.496                           | 0.359    | 0.289     | 0.257     | 0.524                           | 0.502    | 0.506     | 0.416                                       |
| 1.5625                  | 0.19382003   | 0.533                           | 0.523    | 0.458     | 0.448     | 0.638                           | 0.425    | 0.303     | 0.27      | 0.518                           | 0.514    | 0.486     | 0.411                                       |
| 0.78125                 | -0.10721     | 0.504                           | 0.52     | 0.451     | 0.455     | 0.509                           | 0.496    | 0.358     | 0.269     | 0.509                           | 0.5      | 0.492     | 0.448                                       |
| 0.390625                | -0.40824     | 0.527                           | 0.524    | 0.448     | 0.471     | 0.507                           | 0.522    | 0.368     | 0.288     | 0.545                           | 0.515    | 0.504     | 0.469 Excluded from the analysis            |
| 0.1953125               | -0.70927     | 0.537                           | 0.518    | 0.47      | 0.491     | 0.779                           | 0.542    | 0.454     | 0.325     | 0.545                           | 0.515    | 0.511     | 0.487                                       |
| 0.09765625              | -1.0103      | 0.526                           | 0.517    | 0.453     | 0.505     | 0.553                           | 0.554    | 0.503     | 0.365     | 0.603                           | 0.509    | 0.519     | 0.449                                       |
| 0.048828125             | -1.31133     | 0.524                           | 0.5      | 0.473     | 0.464     | 0.526                           | 0.516    | 0.458     | 0.421     | 0.516                           | 0.541    | 0.515     | 0.447                                       |
| 0.024414063             | -1.6123599   | 0.497                           | 0.488    | 0.477     | 0.428     | 0.501                           | 0.611    | 0.422     | 0.453     | 0.524                           | 0.499    | 0.484     | 0.443                                       |
| 0.012207031             | -1.9133899   | 0.503                           | 0.508    | 0.46      | 0.494     | 0.523                           | 0.508    | 0.496     | 0.463     | 0.527                           | 0.465    | 0.478     | 0.443                                       |
| 0.006103516             | -2.2144199   | 0.519                           | 0.509    | 0.44      | 0.485     | 0.535                           | 0.535    | 0.5       | 0.445     | 0.989                           | 0.5      | 0.464     | 0.446                                       |
| 0.003051758             | -2.5154499   | 0.545                           | 0.538    | 0.478     | 0.474     | 0.539                           | 0.514    | 0.498     | 0.507     | 0.556                           | 0.498    | 0.471     | 0.522                                       |
| 0.001525879             | -2.8164799   | 0.56                            | 0.508    | 0.451     | 0.442     | 0.53                            | 0.536    | 0.487     | 0.502     | 0.504                           | 0.5      | 0.502     | 0.456                                       |
|                         |              | Cell viability [%], normalized  |          |           |           | Cell viability [%], normalized  |          |           |           | Cell viability [%], normalized  |          |           |                                             |
|                         |              | Time 1 h                        | Time 6 h | Time 22 h | Time 72 h | Time 1 h                        | Time 6 h | Time 22 h | Time 72 h | Time 1 h                        | Time 6 h | Time 22 h | Time 72 h                                   |
| conditioned medium [μl] | log (S/N μl) |                                 |          |           |           |                                 |          |           |           |                                 |          |           |                                             |
| 50                      | 1.69897      | 84.4                            | 94.0     |           | 108.5     | 18.8                            | 4.4      | 2.9       | -11.4     | 100.0                           | 106.8    | 65.6      | 16.1                                        |
| 25                      | 1.39794001   | 99.3                            | 88.7     | 111.8     | 95.5      | 35.5                            | 7.0      | 6.9       | -8.3      | 86.7                            | 106.8    | 86.5      | 24.9                                        |
| 12.5                    | 1.09691001   | 91.5                            | 94.4     | 100.4     | 91.5      | 56.0                            | 14.7     | 9.1       | 3.9       | 93.9                            | 100.4    | 100.0     | 60.8 Excluded for the determination of EC50 |
| 6.25                    | 0.79588002   | 84.0                            | 94.7     | 105.9     | 91.5      | 66.0                            | 23.4     | 10.9      | 4.8       | 97.8                            | 102.4    | 112.7     | 63.6                                        |
| 3.125                   | 0.49485002   | 91.1                            | 100.8    | 93.7      | 95.1      | 87.2                            | 39.9     | 25.1      | 3.1       | 98.2                            | 101.2    | 110.4     | 76.5                                        |
| 1.5625                  | 0.19382003   | 100.4                           | 102.6    | 100.4     | 88.4      |                                 | 64.1     | 30.2      | 8.7       | 96.1                            | 106.0    | 102.7     | 74.2                                        |
| 0.78125                 | -0.10721     | 90.1                            | 101.5    | 97.5      | 91.5      | 91.8                            | 90.1     | 50.2      | 8.3       | 92.8                            | 100.4    | 105.0     | 91.2                                        |
| 0.390625                | -0.40824     | 98.2                            | 103.0    | 96.2      | 98.7      | 91.1                            | 99.6     | 53.8      | 16.6      | 105.7                           | 106.4    | 109.7     | 100.9                                       |
| 0.1953125               | -0.70927     | 101.8                           | 100.8    | 105.5     | 107.6     |                                 | 107.0    | 85.1      | 32.8      | 105.7                           | 106.4    | 112.4     | 109.2                                       |
| 0.09765625              | -1.0103      | 97.9                            | 100.4    | 98.3      | 113.8     | 107.4                           | 111.4    | 102.9     | 50.2      |                                 | 104.0    | 115.4     | 91.7                                        |
| 0.048828125             | -1.31133     | 97.2                            | 94.0     | 106.8     | 95.5      | 97.9                            | 97.4     | 86.5      | 74.7      | 95.3                            | 116.9    | 113.9     | 90.8                                        |
| 0.024414063             | -1.6123599   | 87.6                            | 89.5     | 108.4     | 79.5      | 89.0                            |          | 73.5      | 88.6      | 98.2                            | 100.0    | 101.9     | 88.9                                        |
| 0.012207031             | -1.9133899   | 89.7                            | 97.0     | 101.3     | 108.9     | 96.8                            | 94.5     | 100.4     | 93.0      | 99.3                            | 86.3     | 99.6      | 88.9                                        |
| 0.006103516             | -2.2144199   | 95.4                            | 97.4     | 92.8      | 104.9     | 101.1                           | 104.4    | 101.8     | 85.2      |                                 | 100.4    | 94.2      | 90.3                                        |
| 0.003051758             | -2.5154499   | 104.6                           | 108.3    | 108.9     | 100.0     | 102.5                           | 96.7     | 101.1     | 112.2     | 109.7                           | 99.6     | 96.9      | 125.3                                       |
| 0.001525879             | -2.8164799   | 109.9                           | 97.0     | 97.5      | 85.7      | 99.3                            | 104.8    | 97.1      | 110.0     | 91.0                            | 100.4    | 108.9     | 94.9                                        |

Quintas et al Figure 4 Panel A

| Effector :        | None                                   |       |       | None                                   |       |       | None                                   |       |       |
|-------------------|----------------------------------------|-------|-------|----------------------------------------|-------|-------|----------------------------------------|-------|-------|
|                   | Jurkat JOM2 BAFFR:Fas-2308 cl21 (CFSE) |       |       | Jurkat JOM2 BAFFR:Fas-2308 cl21 (CFSE) |       |       | Jurkat JOM2 BAFFR:Fas-2308 cl21 (CFSE) |       |       |
|                   | Atacicept                              |       |       | Belimumab                              |       |       | Denosumab                              |       |       |
| Target cells:     |                                        |       |       |                                        |       |       |                                        |       |       |
| Inhibitor:        |                                        |       |       |                                        |       |       |                                        |       |       |
| Measure:          | % viability                            |       |       | % viability                            |       |       | % viability                            |       |       |
| Inhibitor [ng/ml] |                                        |       |       |                                        |       |       |                                        |       |       |
| 20000             | 97.8                                   | 99.6  | 88    | 100.7                                  | 88.7  | 100.2 | 101.8                                  | 103.6 | 98    |
| 5000              | 93.8                                   | 98.4  | 93.3  | 101.1                                  | 98    | 96.2  | 97.8                                   | 96.4  | 96.7  |
| 1250              | 110.9                                  | 119.3 | 102.4 | 97.1                                   | 101.8 | 112.2 | 106.4                                  | 108.7 | 110.2 |
| 312.5             | 102.2                                  | 106.2 | 94    | 98                                     | 98.9  | 102.2 | 108.7                                  | 102.2 | 100.2 |
| 78.125            | 95.3                                   | 101.3 | 92.9  | 89.1                                   | 87.3  | 97.8  | 105.6                                  | 98.7  | 106   |
| 19.53125          | 113.3                                  | 110.9 | 112.7 | 96.7                                   | 84.4  | 91.3  | 104.2                                  | 103.6 | 107.3 |
| 4.882813          | 109.1                                  | 109.8 | 105.3 | 95.1                                   | 102.9 | 135.3 | 103.6                                  | 106   | 105.6 |
| ∅                 | 103.3                                  | 106   | 99.1  | 99.1                                   | 99.6  | 106.9 | 104.2                                  | 97.6  | 114.2 |

Quintas et al Figure 4 Panel B

| Effector :        | 20 ng/ml of Fc-hBAFF-2825              |       |       | 20 ng/ml of Fc-hBAFF-2825              |       |       | 20 ng/ml of Fc-hBAFF-2825              |     |     |
|-------------------|----------------------------------------|-------|-------|----------------------------------------|-------|-------|----------------------------------------|-----|-----|
|                   | Jurkat JOM2 BAFFR:Fas-2308 cl21 (CFSE) |       |       | Jurkat JOM2 BAFFR:Fas-2308 cl21 (CFSE) |       |       | Jurkat JOM2 BAFFR:Fas-2308 cl21 (CFSE) |     |     |
|                   | Atacicept                              |       |       | Belimumab                              |       |       | Denosumab                              |     |     |
| Target cells:     |                                        |       |       |                                        |       |       |                                        |     |     |
| Inhibitor:        |                                        |       |       |                                        |       |       |                                        |     |     |
| Measure:          | % viability                            |       |       | % viability                            |       |       | % viability                            |     |     |
| Inhibitor [ng/ml] |                                        |       |       |                                        |       |       |                                        |     |     |
| 20000             | 103.3                                  | 102.4 | 106.7 | 114.9                                  | 118.5 | 119.8 | 6.7                                    | 6.4 | 6.4 |
| 5000              | 92                                     | 98.4  | 99.1  | 91.8                                   | 115.8 | 117.3 | 7.3                                    | 6.7 | 7.5 |
| 1250              | 92.9                                   | 99.8  | 99.3  | 117.8                                  | 116.4 | 113.1 | 5.8                                    | 6.4 | 6.2 |
| 312.5             | 85.6                                   | 100.4 | 95.5  | 108.4                                  | 125.3 | 121.3 | 5.8                                    | 6   | 6.5 |
| 78.125            | 105.1                                  | 93.1  | 107.5 | 109.5                                  | 100.5 | 112.4 | 6                                      | 4   | 6.4 |
| 19.53125          | 12.7                                   | 9.6   | 11.6  | 7.5                                    | 8.4   | 7.6   | 5.3                                    | 7.3 | 7.8 |
| 4.882813          | 6.9                                    | 6.4   | 6.4   | 6.7                                    | 6.5   | 5.6   | 5.8                                    | 6.5 | 6.5 |
| ∅                 | 7.5                                    | 5.3   | 6.4   | 7.3                                    | 7.3   | 5.8   | 6.5                                    | 6.5 | 7.5 |

Quintas et al Figure 4 Panel C

| Effector :        | U937 BAFF-ko                           |       |       | U937 BAFF-ko                           |       |       | U937 BAFF-ko                           |       |       |
|-------------------|----------------------------------------|-------|-------|----------------------------------------|-------|-------|----------------------------------------|-------|-------|
|                   | Jurkat JOM2 BAFFR:Fas-2308 cl21 (CFSE) |       |       | Jurkat JOM2 BAFFR:Fas-2308 cl21 (CFSE) |       |       | Jurkat JOM2 BAFFR:Fas-2308 cl21 (CFSE) |       |       |
|                   | Atacicept                              |       |       | Belimumab                              |       |       | Denosumab                              |       |       |
| Target cells:     |                                        |       |       |                                        |       |       |                                        |       |       |
| Inhibitor:        |                                        |       |       |                                        |       |       |                                        |       |       |
| Measure:          | % viability                            |       |       | % viability                            |       |       | % viability                            |       |       |
| Inhibitor [ng/ml] |                                        |       |       |                                        |       |       |                                        |       |       |
| 20000             | 88.2                                   | 96.6  | 116.8 | 106                                    | 114.2 | 111.4 | 107.2                                  | 80.4  | 106.6 |
| 5000              | 99                                     | 120.8 | 106.6 | 98                                     | 95    | 104   | 97.4                                   | 87.2  | 88.8  |
| 1250              | 93.2                                   | 101.8 | 111   | 94.8                                   | 100.4 | 108   | 107.2                                  | 98    | 99.6  |
| 312.5             | 98.8                                   | 104.6 | 106   | 111.6                                  | 109.8 | 113   | 109.2                                  | 94    | 91    |
| 78.125            | 109.2                                  | 97.6  | 83    | 87                                     | 125.6 | 106.6 | 104.6                                  | 105   | 94    |
| 19.53125          | 87.2                                   | 83.2  | 108.6 | 108.8                                  | 105.6 | 108.6 | 107.4                                  | 108   | 104   |
| 4.882813          | 72.6*                                  | 96.8  | 69.8* | 100.4                                  | 106.8 | 103.8 | 102                                    | 101.6 | 106.6 |
| ∅                 | 59.6*                                  | 90.6  | 95    | 97.2                                   | 99.8  | 96.2  | 97.6                                   | 95.8  | 91    |

Quintas et al Figure 4 Panel D

| Effector :        | U937 Furin-ko                          |       |       | U937 Furin-ko                          |       |       | U937 Furin-ko                          |      |      |
|-------------------|----------------------------------------|-------|-------|----------------------------------------|-------|-------|----------------------------------------|------|------|
|                   | Jurkat JOM2 BAFFR:Fas-2308 cl21 (CFSE) |       |       | Jurkat JOM2 BAFFR:Fas-2308 cl21 (CFSE) |       |       | Jurkat JOM2 BAFFR:Fas-2308 cl21 (CFSE) |      |      |
|                   | Atacicept                              |       |       | Belimumab                              |       |       | Denosumab                              |      |      |
| Target cells:     |                                        |       |       |                                        |       |       |                                        |      |      |
| Inhibitor:        |                                        |       |       |                                        |       |       |                                        |      |      |
| Measure:          | % viability                            |       |       | % viability                            |       |       | % viability                            |      |      |
| Inhibitor [ng/ml] |                                        |       |       |                                        |       |       |                                        |      |      |
| 20000             | 99.3                                   | 90    | 113.5 | 96.7                                   | 103.5 | 111.6 | 23.5                                   | 26.4 | 26.7 |
| 5000              | 83.5                                   | 83.8  | 112   | 102.2                                  | 107.5 | 112   | 25.6                                   | 22.7 | 22.5 |
| 1250              | 100.7                                  | 86.5  | 112.9 | 99.1                                   | 107.8 | 108.7 | 22.7                                   | 25.6 | 22.4 |
| 312.5             | 106.2                                  | 87.6  | 107.1 | 96.4                                   | 105.8 | 108   | 25.1                                   | 25.3 | 22.7 |
| 78.125            | 114                                    | 105.3 | 115.6 | 96.2                                   | 103.1 | 106.9 | 38.7                                   | 21.8 | 22.2 |
| 19.53125          | 81.6                                   | 77.5  | 84.2  | 70.7                                   | 79.3  | 82    | 21.6                                   | 32.4 | 22.7 |
| 4.882813          | 58.9                                   | 56.9  | 58.5  | 34.9                                   | 62    | 62.5  | 26                                     | 24   | 19.3 |
| 1.220703          | 36.4                                   | 44.9  | 49.3  | 29.6                                   | 37.8  | 48.4  | nd                                     | nd   | nd   |
| 0.2               | 26.9                                   | 27.1  | 26.4  | 16.9                                   | 24.4  | 26.7  | 26.7                                   | 27.6 | 27.5 |

Quintas et al Figure 4 Panel E

| Target cells: | Jurkat JOM2 BAFFR:Fas-2308 cl21         | Jurkat JOM2 BAFFR:Fas-2308 cl21 | Jurkat JOM2 BAFFR:Fas-2308 cl21          | Jurkat JOM2 BAFFR:Fas-2308 cl21 | Jurkat JOM2 BAFFR:Fas-2308 cl21 |
|---------------|-----------------------------------------|---------------------------------|------------------------------------------|---------------------------------|---------------------------------|
| Effector:     | Conditioned medium of U937 BAFF-ko-3515 | Conditioned medium of U937 WT   | Conditioned medium of U937 Furin-ko-3511 | 20 ng/ml Fc-hBAFF-2825          | None                            |
| Measure:      | Reporter cell viability [A492]          | Reporter cell viability [A492]  | Reporter cell viability [A492]           | Reporter cell viability [A492]  | Reporter cell viability [A492]  |
| triplicates   | 1.187<br>1.262<br>1.307                 | 0.292<br>0.306<br>0.306         | 0.95<br>0.823<br>0.944                   | 0.322<br>0.311<br>0.312         | 1.418<br>1.344<br>1.322         |

Quintas et al Figure 5 Panel A

| Reporter cells:               | CHO-3296 clone 7      |       | CHO-3296 clone 7      |       | CHO-3296 clone 7      |       | CHO-3296 clone 7      |       | CHO-3296 clone 7      |       | CHO-3296 clone 7      |       |
|-------------------------------|-----------------------|-------|-----------------------|-------|-----------------------|-------|-----------------------|-------|-----------------------|-------|-----------------------|-------|
| Mediator                      | atacicept             |       | belimumab             |       | denosumab             |       | adalimumab            |       | BCMA-Fc               |       | BCMA-Fc dimer         |       |
| Effector                      | normal human serum    |       | normal human serum    |       | normal human serum    |       | normal human serum    |       | normal human serum    |       | normal human serum    |       |
|                               | cell viability [A492] |       | cell viability [A492] |       | cell viability [A492] |       | cell viability [A492] |       | cell viability [A492] |       | cell viability [A492] |       |
| Effector [ $\mu\text{g/ml}$ ] |                       |       |                       |       |                       |       |                       |       |                       |       |                       |       |
| 10                            | 0.665                 | 0.758 | 0.869                 | 1.02  | 0.968                 | 1.088 | 0.87                  | 1.107 | 0.453                 | 0.4   | 0.417                 | 0.342 |
| 2                             | 0.956                 | 0.919 | 0.988                 | 0.91  | 1.032                 | 0.912 | 0.961                 | 0.891 | 0.413                 | 0.526 | 0.406                 | 0.394 |
| 0.4                           | 1.161                 | 0.866 | 0.97                  | 0.822 | 1.067                 | 0.971 | 0.94                  | 0.928 | 0.441                 | 0.536 | 0.453                 | 0.403 |
| 0.08                          | 0.89                  | 0.909 | 1.066                 | 0.925 | 1.18                  | 0.963 | 0.97                  | 0.874 | 0.628                 | 0.612 | 0.592                 | 0.661 |
| 0.016                         | 0.972                 | 0.878 | 0.884                 | 0.872 | 0.927                 | 0.879 | 0.934                 | 0.855 | 0.897                 | 0.891 | 0.882                 | 0.976 |
| 0.0032                        | 0.893                 | 0.873 | 1.043                 | 0.797 | 0.855                 | 0.886 | 0.827                 | 0.835 | 0.861                 | 0.921 | 0.889                 | 0.789 |
| 0.00064                       | 0.769                 | 0.895 | 0.875                 | 0.9   | 0.894                 | 0.85  | 0.875                 | 0.86  | 0.942                 | 0.918 | 0.889                 | 0.907 |
| 0.000064                      | 0.72                  | 0.862 | 0.982                 | 0.91  | 1.004                 | 0.881 | 0.902                 | 0.807 | 0.855                 | 0.934 | 0.898                 | 0.715 |

  

| Reporter cells:               | CHO-3296 clone 7       |       | CHO-3296 clone 7       |       | CHO-3296 clone 7       |       | CHO-3296 clone 7       |       | CHO-3296 clone 7       |       | CHO-3296 clone 7       |       |
|-------------------------------|------------------------|-------|------------------------|-------|------------------------|-------|------------------------|-------|------------------------|-------|------------------------|-------|
| Mediator                      | atacicept              |       | belimumab              |       | denosumab              |       | adalimumab             |       | BCMA-Fc                |       | BCMA-Fc dimer          |       |
| Effector                      | heat-inactivated serum |       | heat-inactivated serum |       | heat-inactivated serum |       | heat-inactivated serum |       | heat-inactivated serum |       | heat-inactivated serum |       |
|                               | cell viability [A492]  |       | cell viability [A492]  |       | cell viability [A492]  |       | cell viability [A492]  |       | cell viability [A492]  |       | cell viability [A492]  |       |
| Effector [ $\mu\text{g/ml}$ ] |                        |       |                        |       |                        |       |                        |       |                        |       |                        |       |
| 10                            | 0.799                  | 0.702 | 0.85                   | 0.796 | 0.944                  | 0.687 | 0.889                  | 0.901 | 0.792                  | 0.787 | 0.659                  | 0.93  |
| 2                             | 0.827                  | 0.88  | 0.805                  | 0.818 | 0.828                  | 0.985 | 0.856                  | 0.84  | 0.834                  | 0.939 | 0.879                  | 1.028 |
| 0.4                           | 0.863                  | 0.885 | 0.85                   | 0.87  | 0.891                  | 0.981 | 0.934                  | 0.806 | 0.855                  | 0.906 | 0.843                  | 0.964 |
| 0.08                          | 0.958                  | 0.897 | 0.904                  | 0.955 | 0.943                  | 0.979 | 0.962                  | 0.798 | 0.996                  | 0.896 | 0.966                  | 0.806 |
| 0.016                         | 0.976                  | 0.946 | 0.975                  | 0.881 | 0.945                  | 0.881 | 0.899                  | 0.788 | 0.915                  | 0.92  | 0.928                  | 0.901 |
| 0.0032                        | 0.917                  | 0.942 | 0.93                   | 1.019 | 0.953                  | 0.915 | 0.933                  | 0.824 | 0.865                  | 0.831 | 0.87                   | 0.89  |
| 0.00064                       | 0.877                  | 0.853 | 0.843                  | 0.897 | 0.894                  | 0.85  | 0.85                   | 0.784 | 0.9                    | 0.8   | 0.871                  | 0.871 |
| 0.000064                      | 0.921                  | 0.866 | 0.903                  | 0.986 | 0.931                  | 1.148 | 1.012                  | 0.748 | 0.963                  | 0.788 | 0.851                  | 0.89  |

  

| Reporter cells:               | CHO cells             |       | CHO cells             |       | CHO cells             |       | CHO cells             |       | CHO cells             |       | CHO cells             |       |
|-------------------------------|-----------------------|-------|-----------------------|-------|-----------------------|-------|-----------------------|-------|-----------------------|-------|-----------------------|-------|
| Mediator                      | atacicept             |       | belimumab             |       | denosumab             |       | adalimumab            |       | BCMA-Fc               |       | BCMA-Fc dimer         |       |
| Effector                      | normal human serum    |       | normal human serum    |       | normal human serum    |       | normal human serum    |       | normal human serum    |       | normal human serum    |       |
|                               | cell viability [A492] |       | cell viability [A492] |       | cell viability [A492] |       | cell viability [A492] |       | cell viability [A492] |       | cell viability [A492] |       |
| Effector [ $\mu\text{g/ml}$ ] |                       |       |                       |       |                       |       |                       |       |                       |       |                       |       |
| 10                            | 1.003                 | 1.071 | 1.003                 | 0.764 | 0.984                 | 1.279 | 0.974                 | 1.162 | 0.961                 | 1.141 | 0.961                 | 1.2   |
| 2                             | 1.003                 | 1.063 | 0.926                 | 1.122 | 0.999                 | 1.279 | 0.977                 | 1.189 | 0.931                 | 1.081 | 0.945                 | 1.082 |
| 0.4                           | 0.978                 | 1.1   | 0.965                 | 1.107 | 0.945                 | 1.253 | 0.979                 | 1.167 | 0.963                 | 1.088 | 1.02                  | 0.926 |
| 0.08                          | 0.967                 | 1.09  | 0.933                 | 1.18  | 0.959                 | 1.058 | 0.929                 | 1.051 | 0.983                 | 1.034 | 1.006                 | 1.027 |
| 0.016                         | 0.985                 | 1.079 | 0.962                 | 1.12  | 0.955                 | 1.092 | 0.946                 | 0.99  | 0.919                 | 0.915 | 1.031                 | 0.981 |
| 0.0032                        | 0.944                 | 1.088 | 0.943                 | 1.138 | 0.922                 | 1.064 | 0.968                 | 0.999 | 1.006                 | 1.023 | 1.07                  | 1.021 |
| 0.00064                       | 1.022                 | 1.06  | 0.967                 | 1.039 | 0.943                 | 1.088 | 1.003                 | 1.063 | 0.983                 | 1.022 | 1                     | 1.012 |
| 0.000064                      | 0.988                 | 0.98  | 0.994                 | 0.809 | 0.982                 | 1.048 | 1.016                 | 1.025 | 1.066                 | 1.004 | 1.028                 | 1.057 |

  

| Reporter cells:               | CHO cells              |       | CHO cells              |       | CHO cells              |       | CHO cells              |       | CHO cells              |       | CHO cells              |       |
|-------------------------------|------------------------|-------|------------------------|-------|------------------------|-------|------------------------|-------|------------------------|-------|------------------------|-------|
| Mediator                      | atacicept              |       | belimumab              |       | denosumab              |       | adalimumab             |       | BCMA-Fc                |       | BCMA-Fc dimer          |       |
| Effector                      | heat-inactivated serum |       | heat-inactivated serum |       | heat-inactivated serum |       | heat-inactivated serum |       | heat-inactivated serum |       | heat-inactivated serum |       |
|                               | cell viability [A492]  |       | cell viability [A492]  |       | cell viability [A492]  |       | cell viability [A492]  |       | cell viability [A492]  |       | cell viability [A492]  |       |
| Effector [ $\mu\text{g/ml}$ ] |                        |       |                        |       |                        |       |                        |       |                        |       |                        |       |
| 10                            | 0.982                  | 1.069 | 1.024                  | 1.023 | 0.893                  | 0.912 | 0.977                  | 0.939 | 1.175                  | 0.982 | 0.964                  | 0.992 |
| 2                             | 0.934                  | 1.01  | 0.983                  | 0.95  | 0.932                  | 0.997 | 0.959                  | 0.944 | 1.005                  | 0.938 | 0.945                  | 1.037 |
| 0.4                           | 0.937                  | 0.91  | 0.973                  | 0.918 | 0.986                  | 0.925 | 0.948                  | 0.949 | 0.98                   | 0.965 | 1.044                  | 0.919 |
| 0.08                          | 0.894                  | 0.882 | 0.91                   | 0.905 | 0.914                  | 0.949 | 0.977                  | 0.926 | 0.985                  | 0.901 | 1.102                  | 0.888 |
| 0.016                         | 0.875                  | 0.906 | 0.855                  | 1     | 0.9                    | 0.935 | 0.967                  | 0.955 | 0.966                  | 0.976 | 1.029                  | 0.983 |
| 0.0032                        | 0.925                  | 0.778 | 0.946                  | 0.972 | 0.979                  | 0.992 | 0.994                  | 0.825 | 0.995                  | 1.009 | 1.094                  | 1.002 |
| 0.00064                       | 0.938                  | 1.013 | 0.92                   | 0.896 | 0.979                  | 0.995 | 1.035                  | 1.087 | 1.046                  | 1.096 | 1.053                  | 0.876 |
| 0.000064                      | 0.992                  | 0.713 | 0.986                  | 0.998 | 0.995                  | 0.926 | 1.044                  | 1.011 | 1.043                  | 0.925 | 1.108                  | 0.962 |

Quintas et al Figure 5 Panel B

| Reporter cells:  | Jurkat FcγRIIa NFAT-luc |       |       | Jurkat FcγRIIa NFAT-luc |        |       | Jurkat FcγRIIa NFAT-luc |       |       | Jurkat FcγRIIa NFAT-luc            |       |        |
|------------------|-------------------------|-------|-------|-------------------------|--------|-------|-------------------------|-------|-------|------------------------------------|-------|--------|
| Effector:        | Adalimumab              |       |       | Atacicept               |        |       | Belimumab               |       |       | BCMA-Fc-739 not size-fractionated) |       |        |
| Measure:         | RLU signal              |       |       | RLU signal              |        |       | RLU signal              |       |       | RLU signal                         |       |        |
| Effector [μg/ml] |                         |       |       |                         |        |       |                         |       |       |                                    |       |        |
| 1                | -6320                   | -7170 | 1050  | -5710                   | -12250 | 17080 | -20                     | -2670 | 8050  | 88030                              | 87680 | 90890  |
| 0.3333333        | -1790                   | 800   | 5770  | -770                    | 4780   | 21830 | 2880                    | -780  | 10720 | 88270                              | 98460 | 103920 |
| 0.1111111        | -220                    | 9020  | 5860  | -1610                   | 8170   | 14270 | 2010                    | 1830  | 11190 | 72860                              | 94950 | 99680  |
| 0.03703704       | -5610                   | -5870 | 7970  | -4760                   | 4680   | 10870 | -1460                   | 3560  | 8250  | 48880                              | 68020 | 68860  |
| 0.01234568       | -2260                   | -4710 | 7290  | -4000                   | 3000   | 7040  | 1820                    | 2150  | 10320 | 36260                              | 41010 | 34860  |
| 0.004115226      | 2590                    | -7750 | 12500 | -1490                   | -590   | 9590  | 30                      | 5660  | -3900 | 12520                              | 14250 | 20090  |
| 0.001371742      | -2930                   | 1170  | 10600 | -4200                   | -4580  | 4540  | 2410                    | 1250  | 3550  | -130                               | 11250 | 7650   |
| ∅                | 0                       | 0     | 0     | 0                       | 0      | 0     | 0                       | 0     | 0     | 0                                  | 0     | 0      |

Remark: Background signal in untreated cells (∅) (~100'000) was subtracted
